# Supplementary material
Source: Springer Nature journal article supplement (https://www.springermedizin.de/resource/supplementary/12885_2006_824_MOESM1_ESM.pdf/9470426)

# Group A

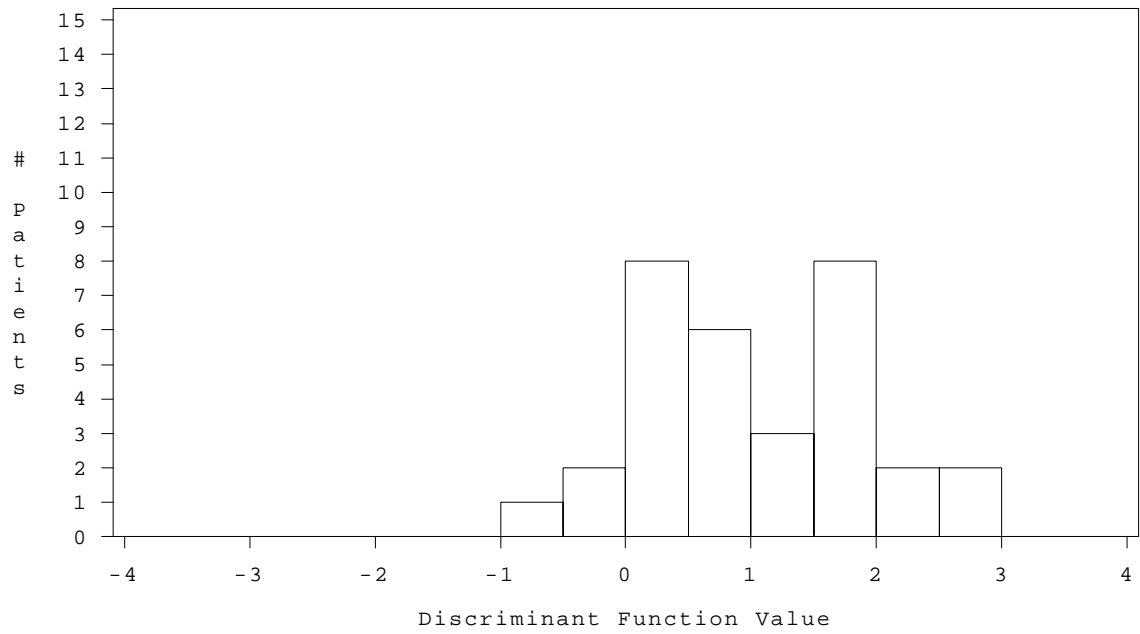

# Group B

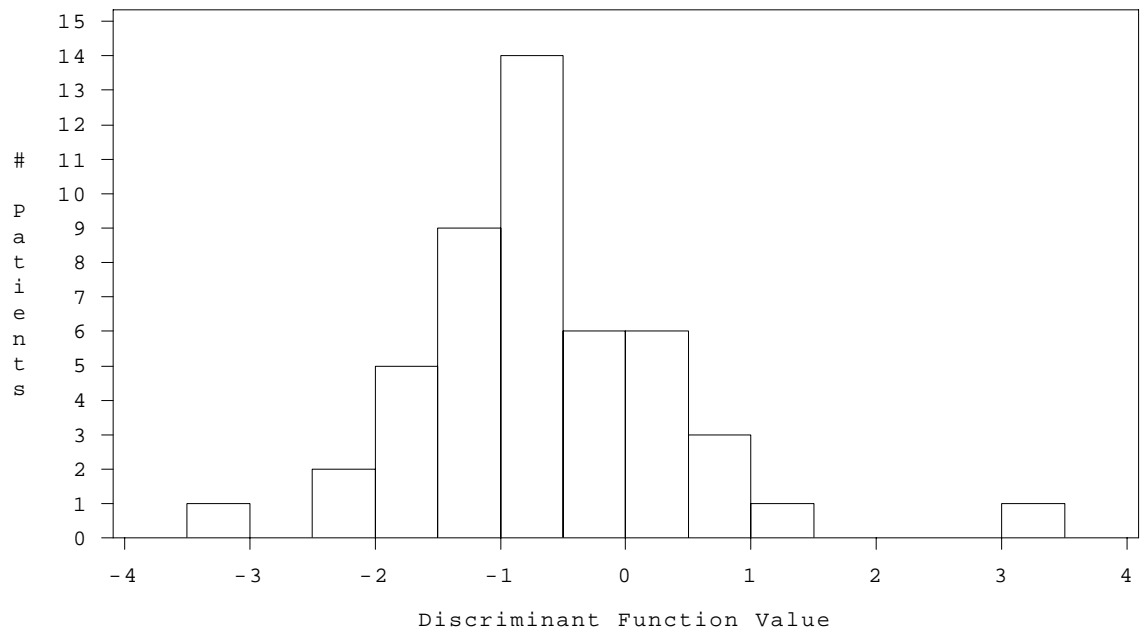

Supplement: MOESM1 [file 9470426]
